# Supplementary material for: Analysis of the Aerosol Generated from Tetrahydrocannabinol, Vitamin E Acetate, and Their Mixtures
Source: MDPI journal article supplement (doi:10.3390/toxics10020088), 2022-02-15
Supplement: s1 [file s1]

# Supplementary Materials: Analysis of the Aerosol Generated from Tetrahydrocannabinol, Vitamin E Acetate, and Their Mixtures

Vladimir B. Mikheev and Alexander Ivanov

**Table S1.** Acquisition parameters for non-targeted chemical analysis by two-dimensional gas-chromatography–time-of-flight mass-spectrometry (GC × GC-TOFMS).

|                                                  |                                                                                                                                    |
|--------------------------------------------------|------------------------------------------------------------------------------------------------------------------------------------|
| GC×GC-TOFMS system                               | LECO Pegasus 4D                                                                                                                    |
| GC 1st-dimension column                          | 100% dimethylpolysiloxane, 30 m, 0.25 mm i.d., 1 µm d <sub>f</sub>                                                                 |
| GC 2nd-dimension column                          | 50% phenyl polysilphenylene-siloxane 1 m, 0.1 mm i.d., 0.1 µm d <sub>f</sub>                                                       |
| GC carrier gas                                   | Helium                                                                                                                             |
| GC carrier gas flow rate                         | Constant flow, 1.3 mL/min                                                                                                          |
| GC inlet temperature                             | 250 °C                                                                                                                             |
| GC injection volume                              | 1 µL splitless                                                                                                                     |
| GC 1st-dimension column oven program             | 45 °C (1.5 min hold)<br>45 °C–100 °C @ 20 °C/min<br>100 °C–270 °C @ 3 °C/min; hold 1 min<br>270 °C–320 °C @ 20 °C/min; hold 26 min |
| GC 2nd-dimension column oven program             | 80 °C (1.5 min hold)<br>80 °C–275 °C @ 3 °C/min<br>275 °C – 330 °C @ 20 °C/min; hold 21 min                                        |
| GC modulator temperature off-set from first oven | +20 °C                                                                                                                             |
| GC modulation time                               | 3 seconds                                                                                                                          |
| Transfer line temperature                        | 290 °C                                                                                                                             |
| MS source temperature                            | 200 °C                                                                                                                             |
| MS detector voltage                              | Tune voltage + 200 V                                                                                                               |
| MS acquisition masses                            | 35–600 amu                                                                                                                         |
| MS data acquisition rate                         | 100 spectra per second                                                                                                             |
| MS resolving power                               | Unit mass resolution                                                                                                               |
